# Supplementary material
Source: PubMed Central journal article supplement (PMC3037655)

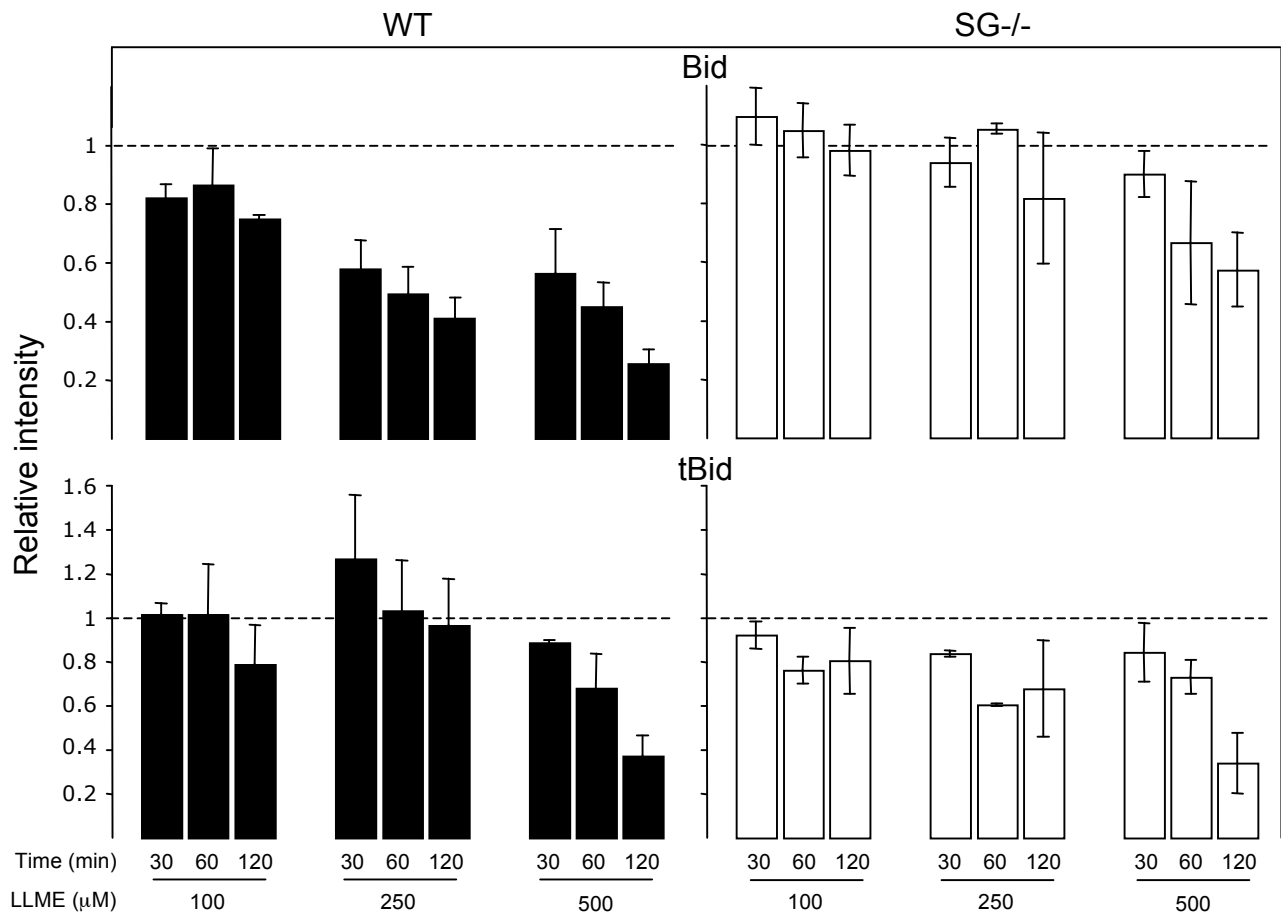

Supplement Fig. 1

Supplement: supp_M110.176461_jbc.M110.176461-1.pdf [file supp_M110.176461_jbc.M110.176461-1.pdf]
